# Supplementary material for: Genome Analysis and Potential Ecological Functions of Members of the Genus Ensifer from Subsurface Environments and Description of Ensifer oleiphilus sp. nov.
Source: MDPI journal article supplement (doi:10.3390/microorganisms11092314), 2023-09-14
Supplement: s1 [file s1]

## Supplementary Materials

### Genome Analysis and Potential Ecological Functions of Members of the Genus *Ensifer* from Subsurface Environments and Description of *Ensifer oleiphilus* sp. nov.

Alexey P. Ershov <sup>1</sup>, Tamara L. Babich <sup>1</sup>, Denis S. Grouzdev <sup>2</sup>, Diyana S. Sokolova <sup>1</sup>, Ekaterina M. Semenova <sup>1</sup>, Alexander N. Avtukh <sup>3</sup>, Andrey B. Poltarus <sup>4</sup>, Elena A. Ianutsevich <sup>1</sup> and Tamara N. Nazina <sup>1,\*</sup>

<sup>1</sup> Winogradsky Institute of Microbiology, Research Center of Biotechnology of the Russian Academy of Sciences, 119071 Moscow, Russia; sokolovadiyana@gmail.com (D.S.S.); semenova\_inmi@mail.ru (E.M.S.); e.a.ianutsevich@gmail.com (E.A.I.); nazina@inmi.ru (T.N.N.)

<sup>2</sup> SciBear OU, 10115 Tallinn, Estonia; denisgrouzdev@gmail.com (D.S.G.)

<sup>3</sup> Skryabin Institute of Biochemistry and Physiology of Microorganisms, Russian Academy of Sciences, Pushchino Scientific Center for Biological Research of the Russian Academy of Sciences, 142290 Pushchino, Russia; avtukh@rambler.ru (A.N.A.)

<sup>4</sup> Engelhardt Institute of Molecular Biology, Russian Academy of Sciences, 119991 Moscow, Russia; abpolt@gmail.com (A.B.P.)

\* Correspondence: nazina@inmi.ru; Tel.: +7-499-135-0341

Supplementary Figures S1-S10

Supplementary Tables S1-S4

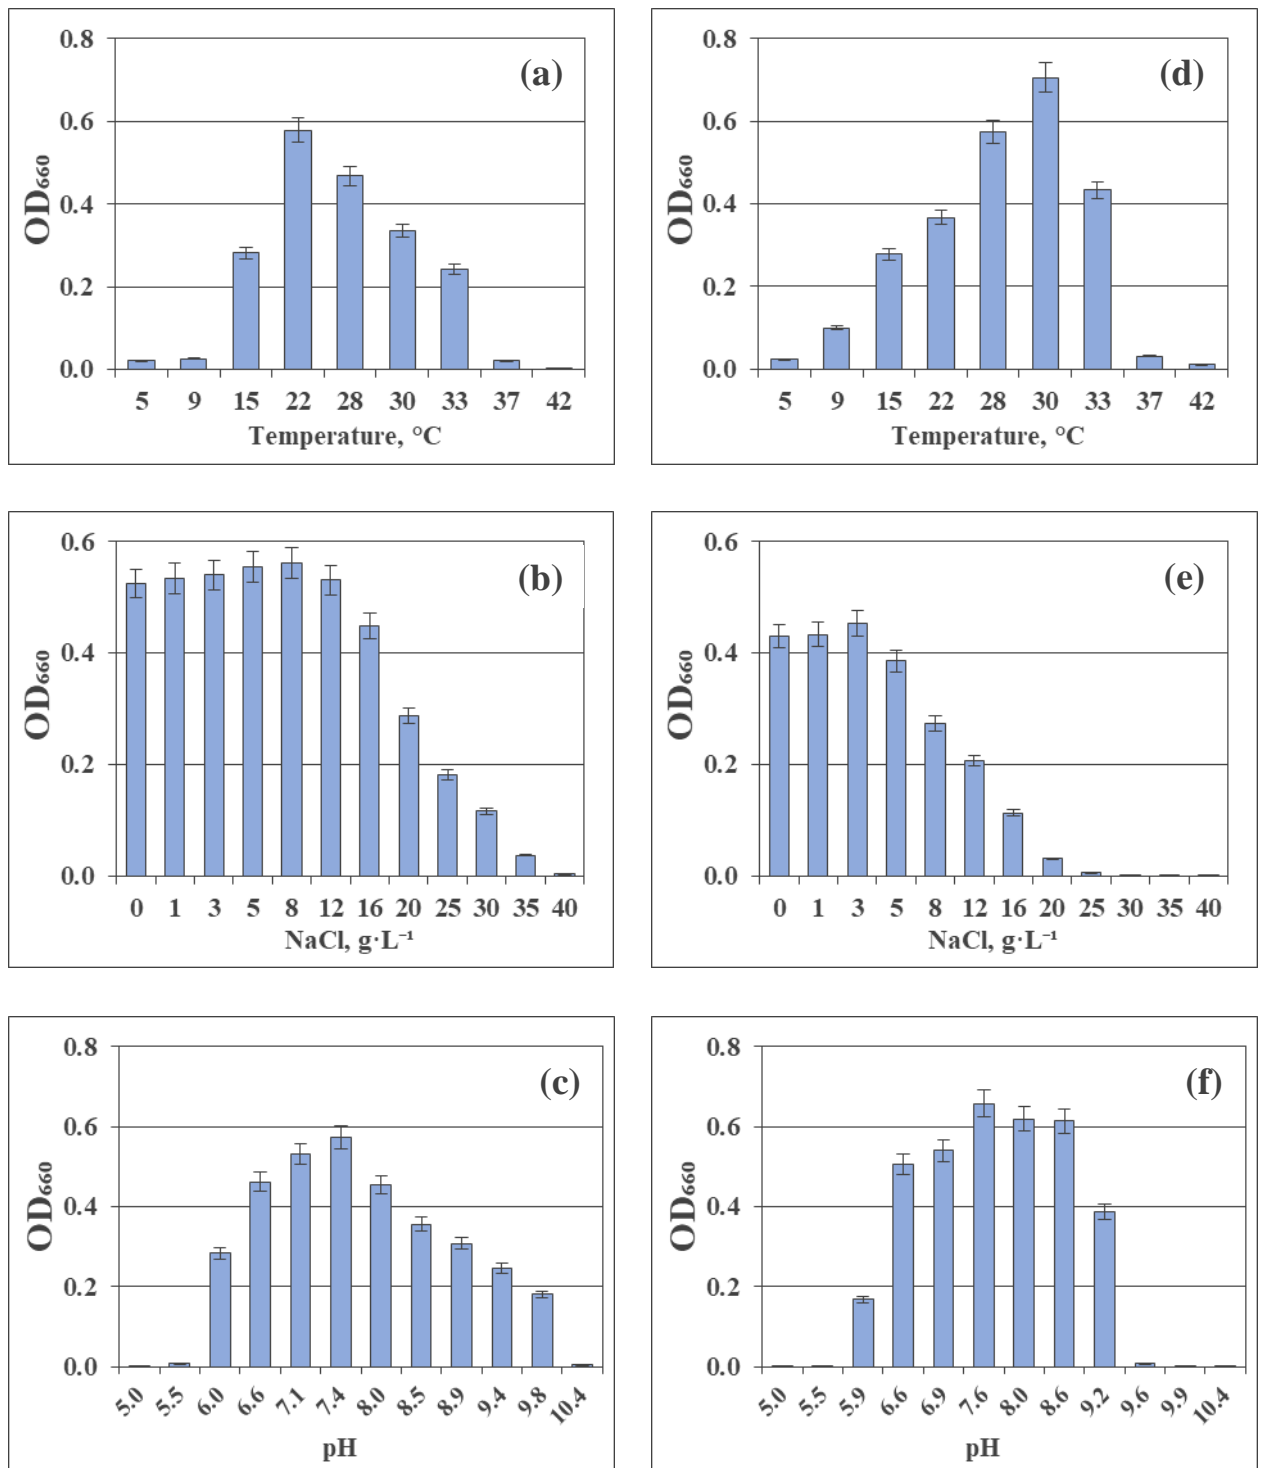

**Figure S1.** Growth profiles of strains HO-A22<sup>T</sup> (a-c) and '*E. canadensis*' SHC 2-14 (d-f) in the TEG medium at various temperatures (a, d), NaCl concentrations (w/v, %) (b, e), and pH (c, f).

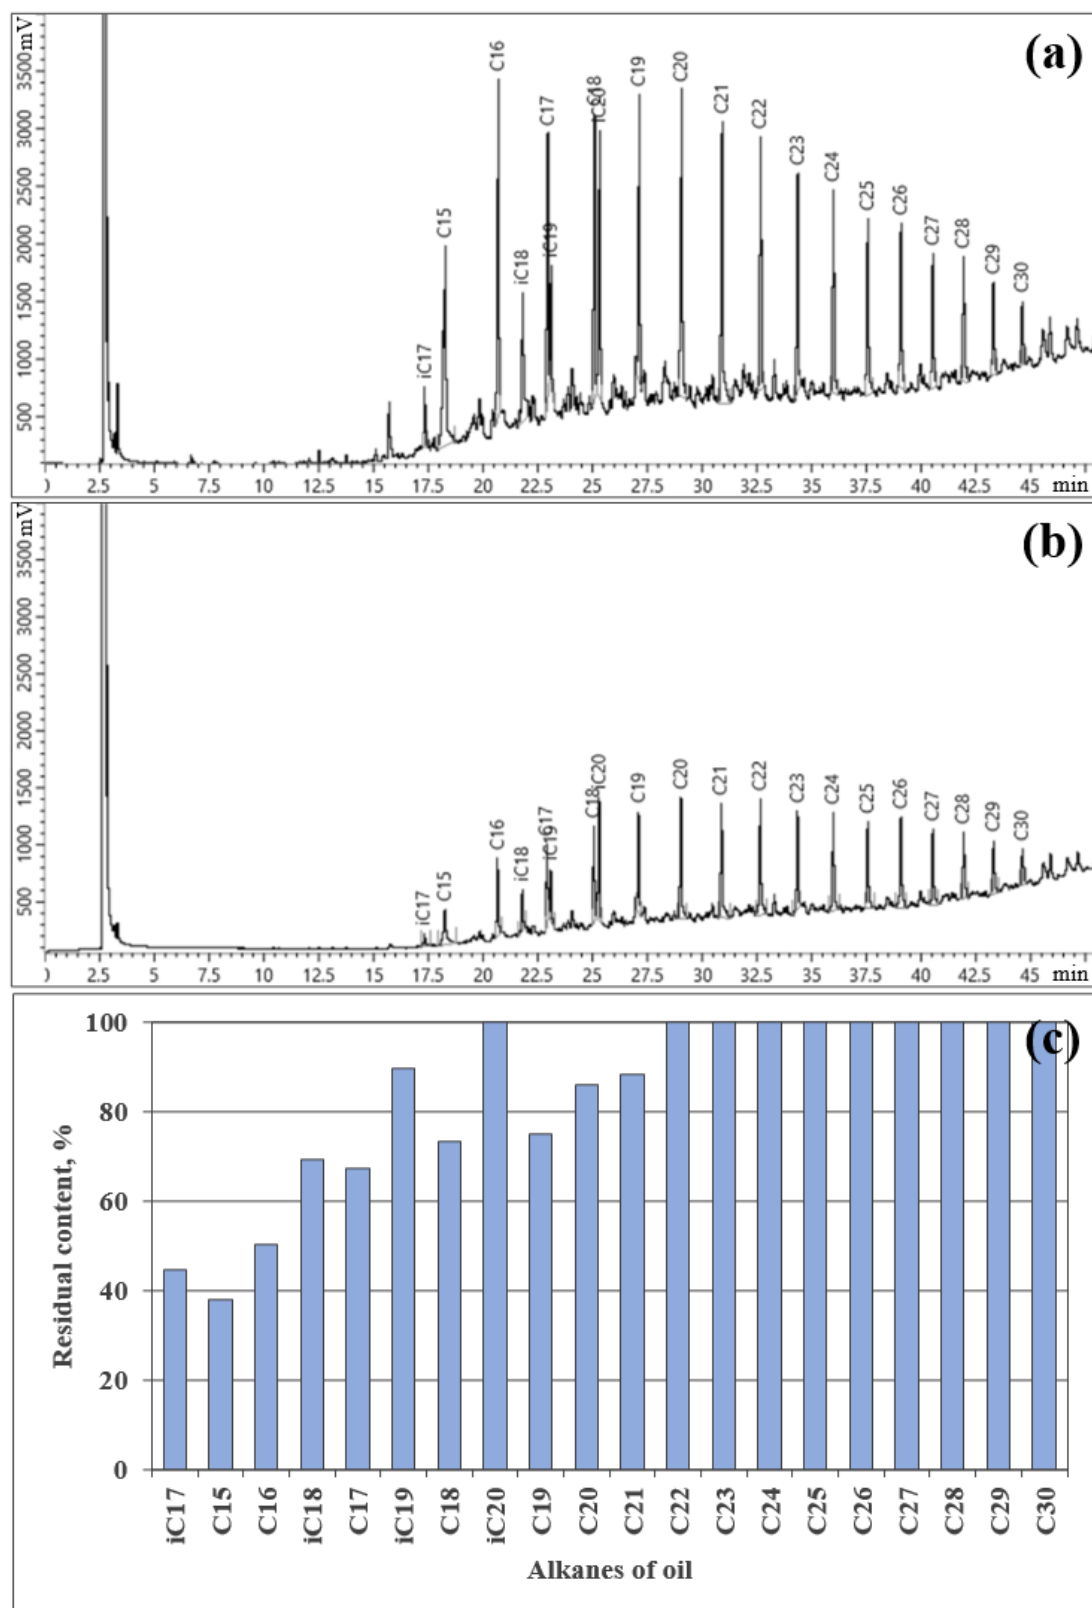

**Figure S2.** Chromatograms of the saturated hydrocarbon fraction of sterile oil (a) and oil degraded by the strain HO-A22<sup>T</sup> (b) and residual content of alkanes (%) in oil degraded by the strain HO-A22<sup>T</sup> (c). The strain was incubated in a liquid medium with crude oil as a substrate at 30 °C for 30 days.

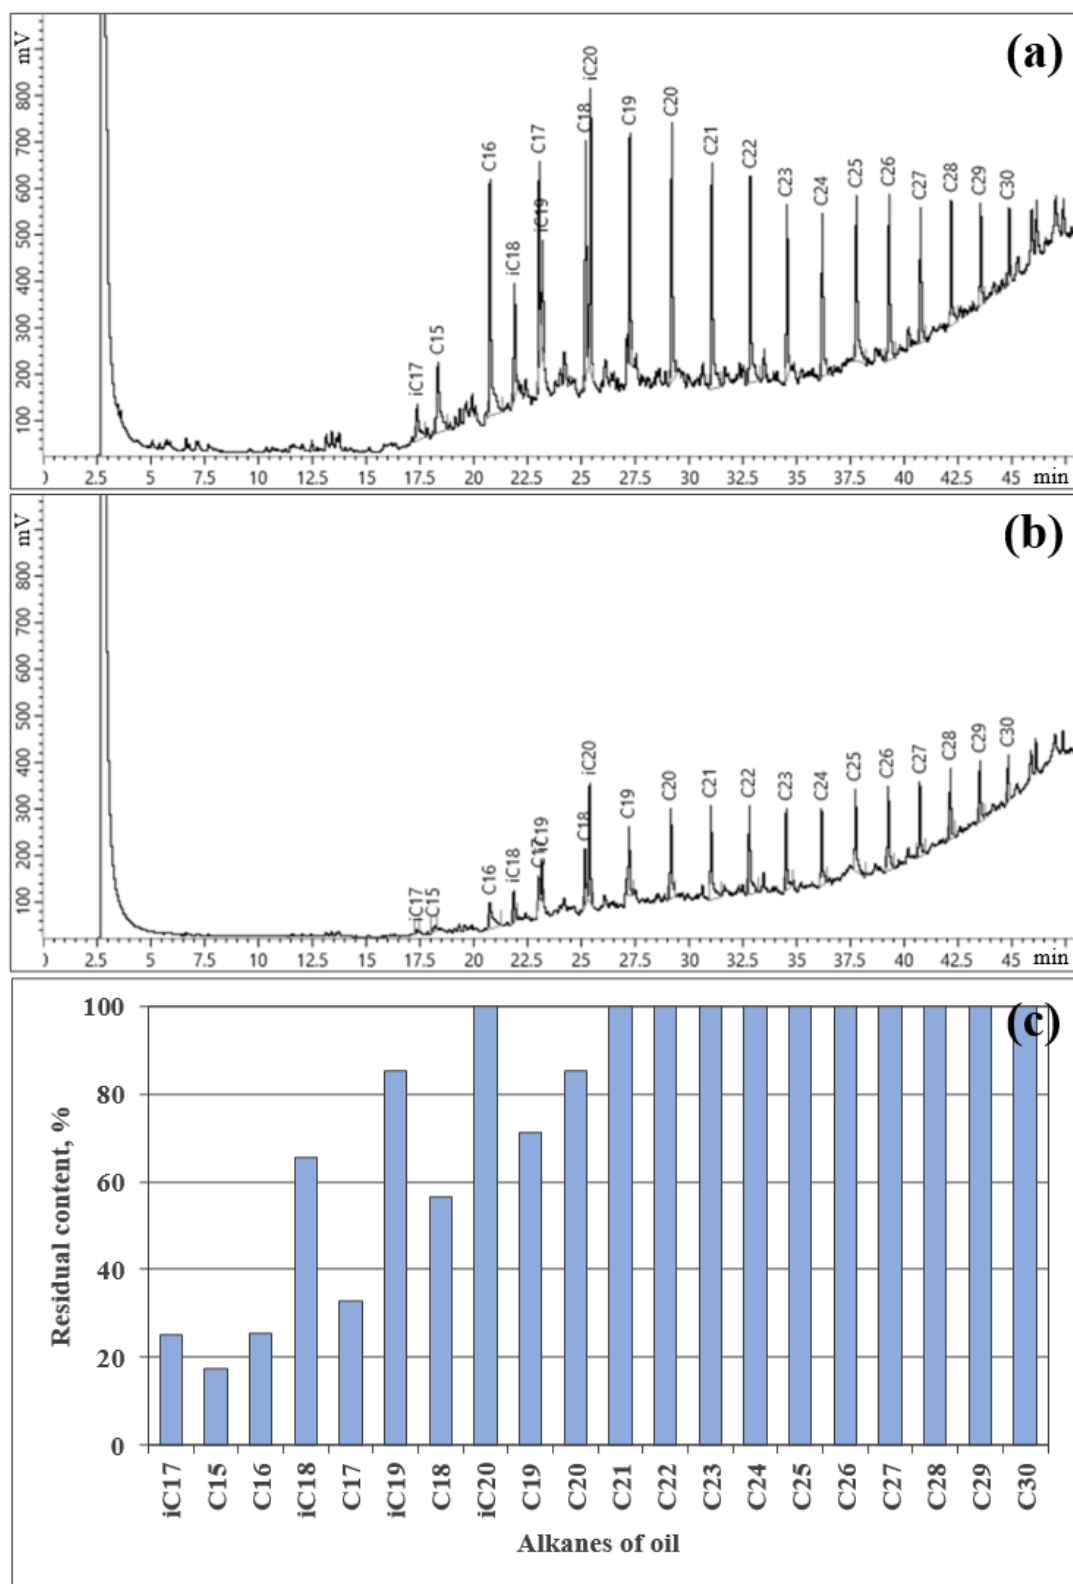

**Figure S3.** Chromatograms of the saturated hydrocarbon fraction of sterile oil (a) and oil degraded by the strain 'E. canadensis' SHC 2-14 (b) and residual content of alkanes (%) in oil degraded by the strain SHC 2-14 (c). The strain was incubated in a liquid medium with crude oil as a substrate at 30 °C for 30 days.

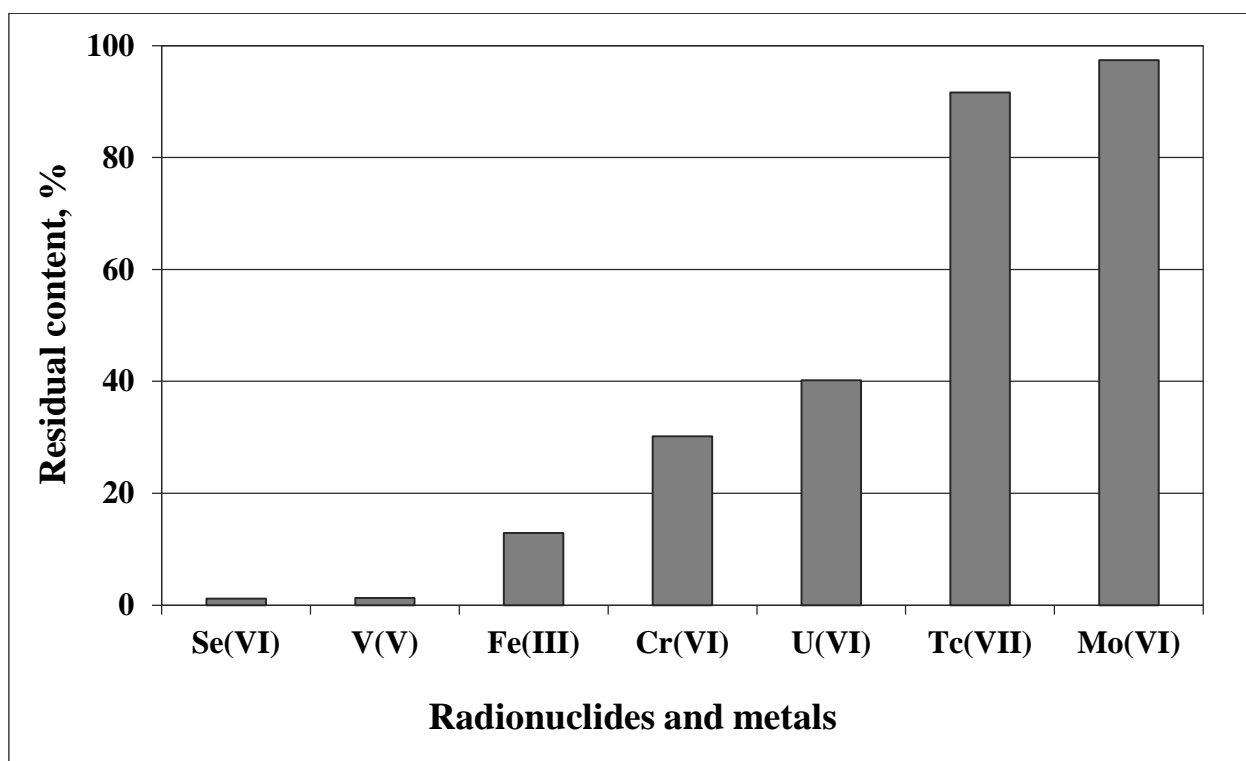

**Figure S4.** Residual content (%) of Se(VI), V(V), Fe(III), Cr(VI), U(VI), Tc(VII), and Mo(VI) in the medium after incubation of the strain '*E. canadensis*' SHC 2-14 at 22 °C for 10 days. The strain grew in the Adkins mineral medium with sodium acetate (20 mM) or sodium lactate (30 mM).

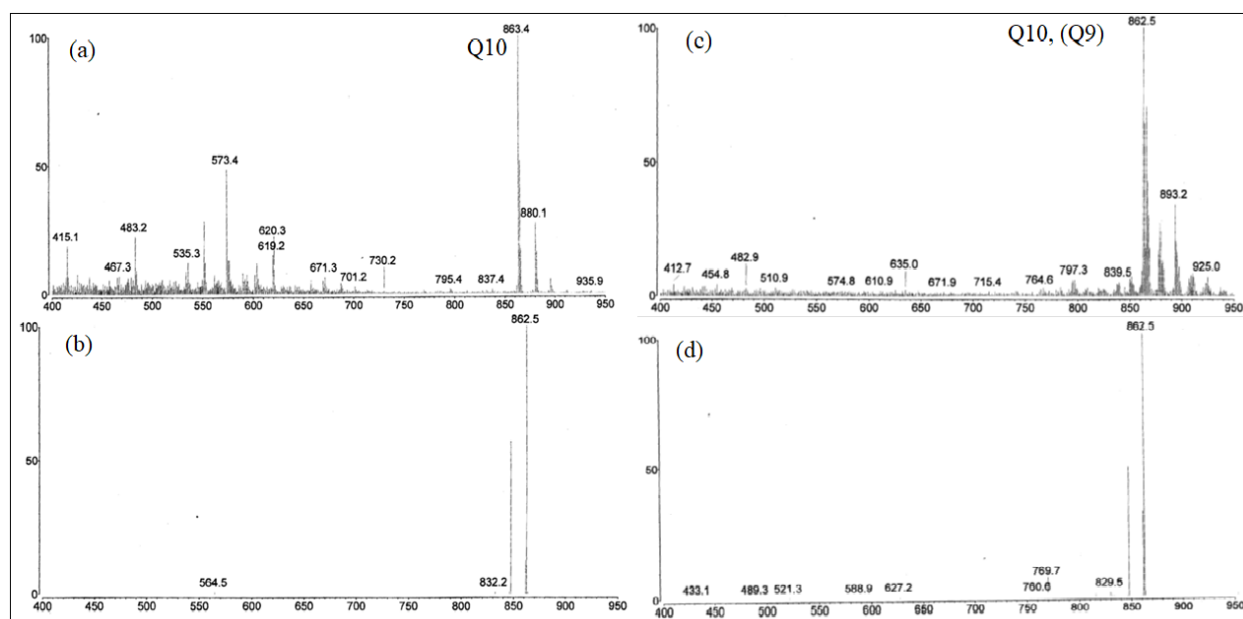

**Figure S5.** Mass spectra of menaquinones from the strains HO-A22<sup>T</sup> (a, b) and '*E. canadensis*' SHC 2-14 (c, d), showing the presence of menaquinone Q10.

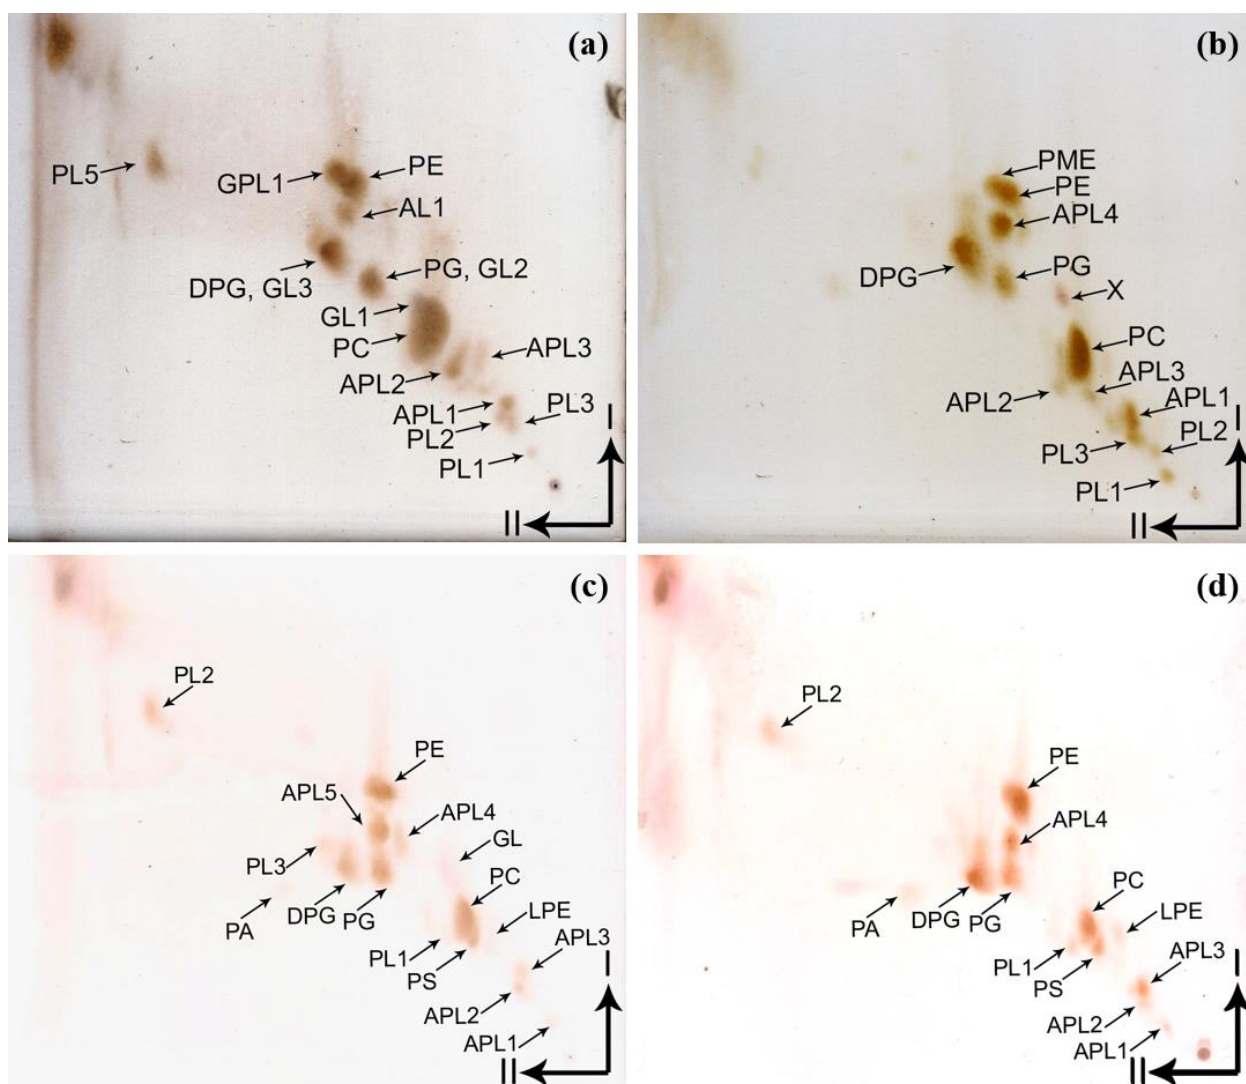

**Figure S6.** Two-dimensional thin layer chromatogram of polar lipids from strains HO-A22<sup>T</sup> (a), '*E. canadensis*' SHC 2-14 (b), *E. adhaerens* A<sup>T</sup> (c), and *E. morelensis* Lc04<sup>T</sup> (d). The components were visualized by staining with 5% sulfuric acid in ethanol and heating at 180 °C for 15 min. Abbreviations: PC, phosphatidylcholines; PE, phosphatidylethanolamines; DPG, diphosphatidylglycerols; PG, phosphatidylglycerols; PME, phosphatidylmethylethanolamines; PS, phosphatidylserines; APL1–APL5, aminophospholipids; PL1–PL5, phospholipids; GL1–GL3, glycolipids; GPL1, glycophospholipid; AL1, aminolipid; PA, phosphatidic acids; LPE, lysophosphatidylethanolamines; X, unidentified lipid.

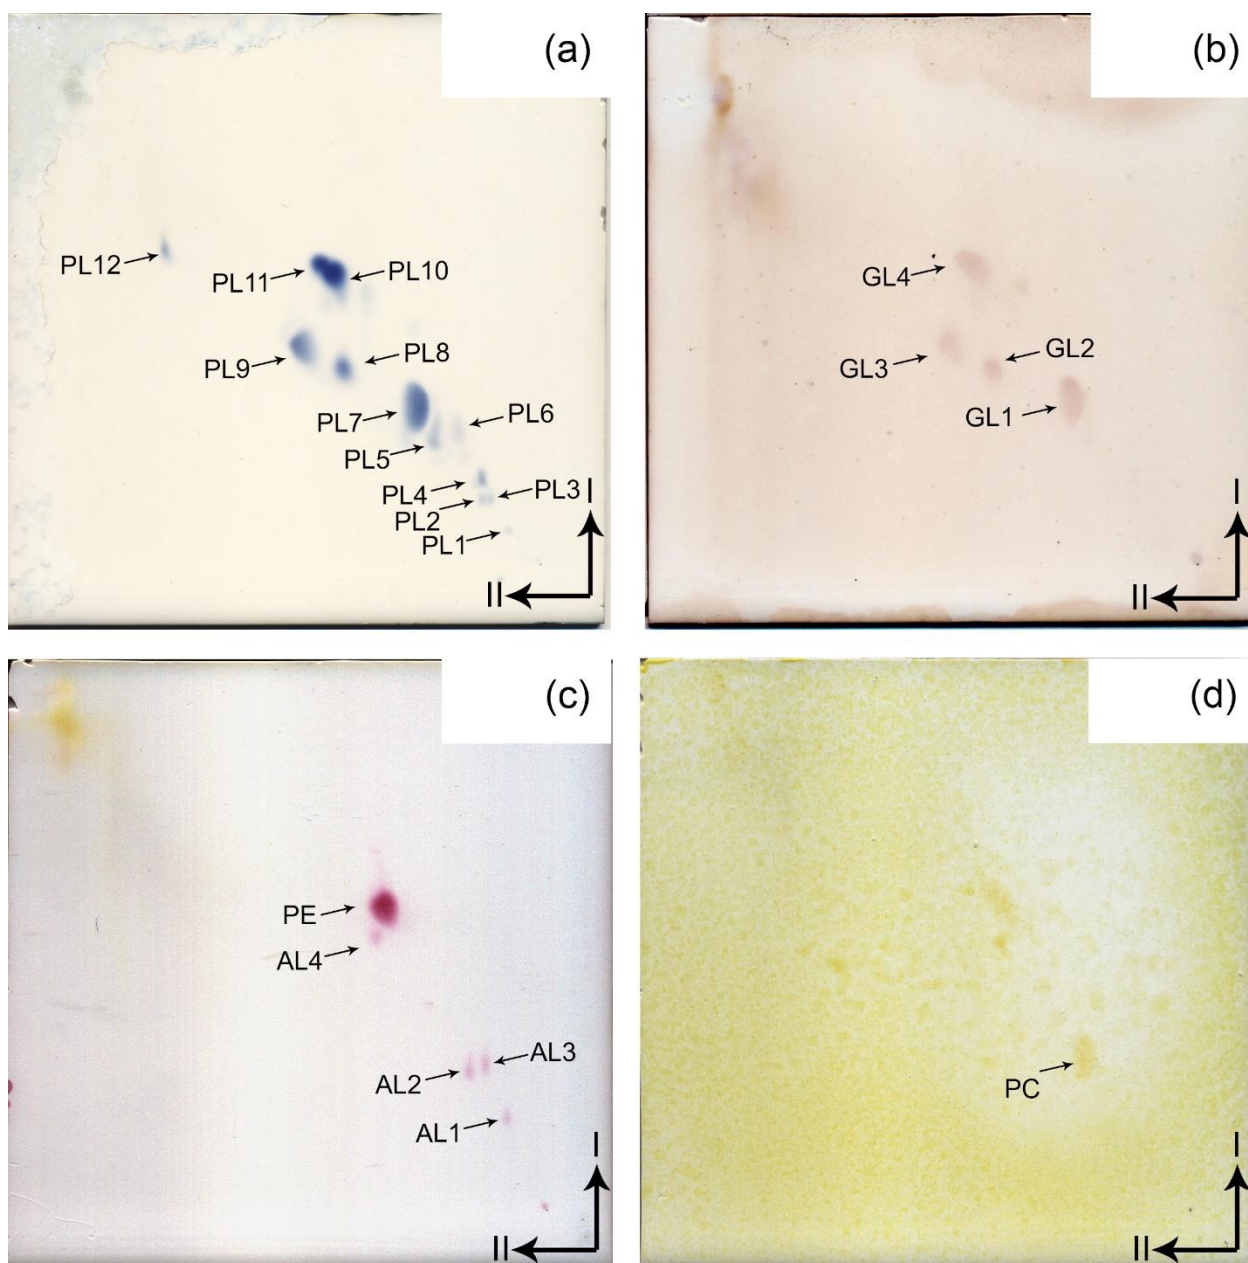

**Figure S7.** Identification of polar lipids from the strain HO-A22<sup>T</sup>. The components were visualized by molybdenum blue (a);  $\alpha$ -naphthol (b); ninhydrin (c); and Dragendorff (d). Abbreviations: AL, aminolipids; GL, glycolipids; PC, phosphatidylcholines; PE, phosphatidylethanolamines; PL, phospholipids.



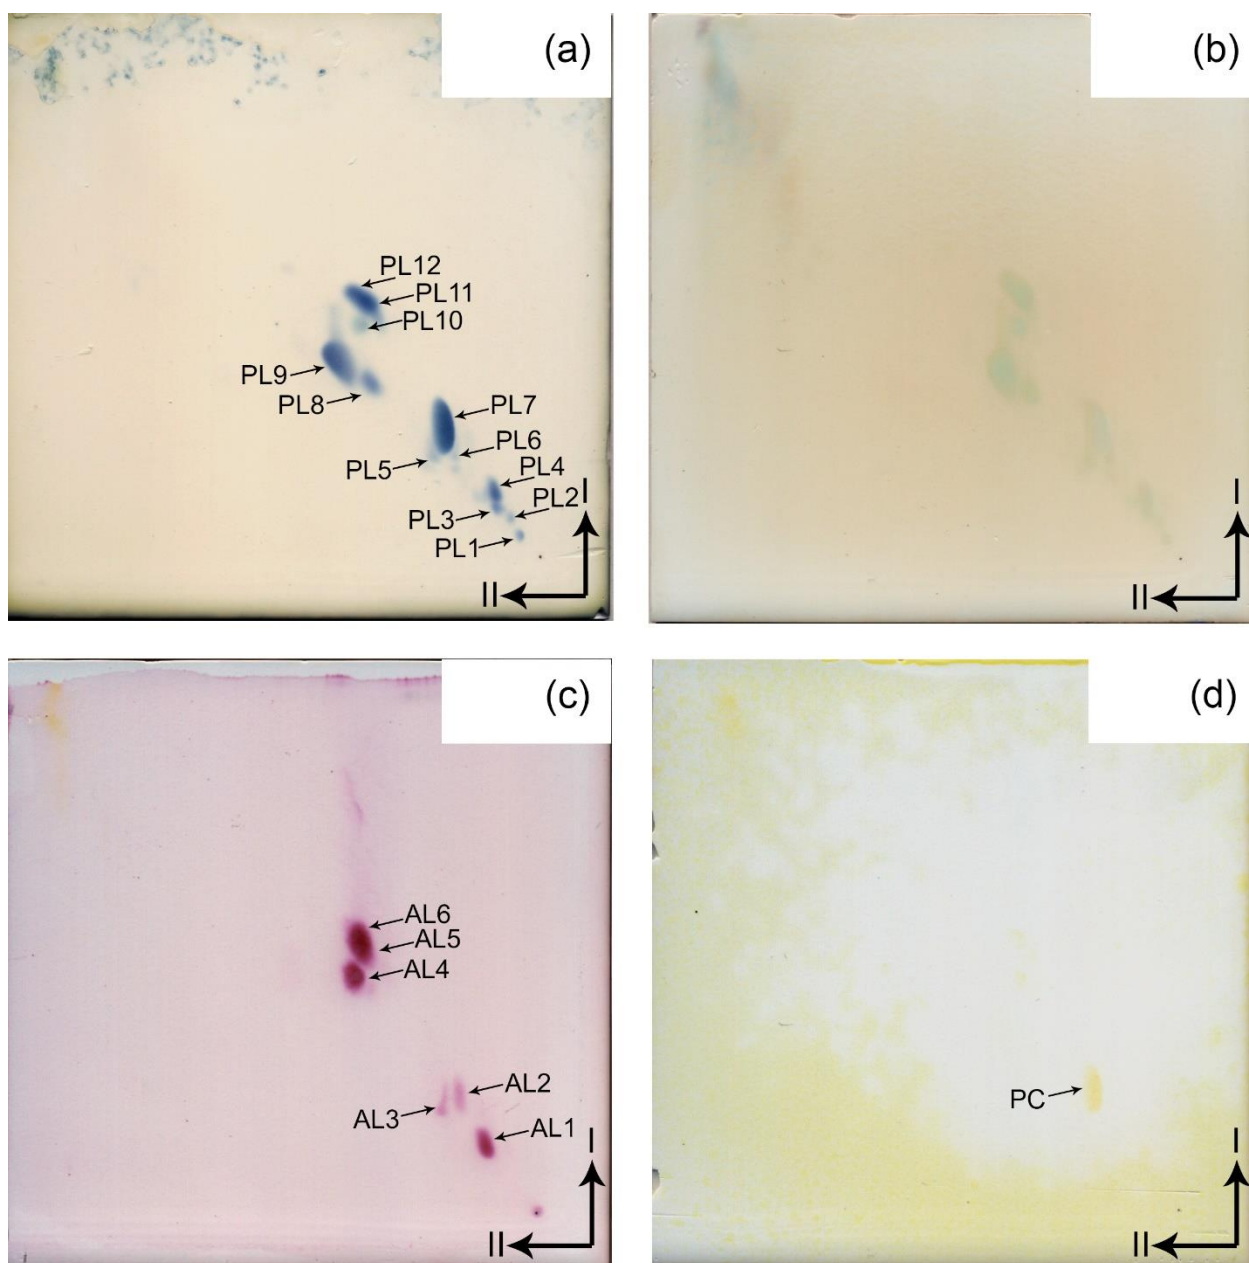

**Figure S8.** Identification of polar lipids from the strain '*E. canadensis*' SHC 2-14. The components were visualized by molybdenum blue (a);  $\alpha$ -naphthol (b); ninhydrin (c); and Dragendorff (d). Abbreviations: AL, aminolipids; PC, phosphatidylcholines; PL, phospholipids.



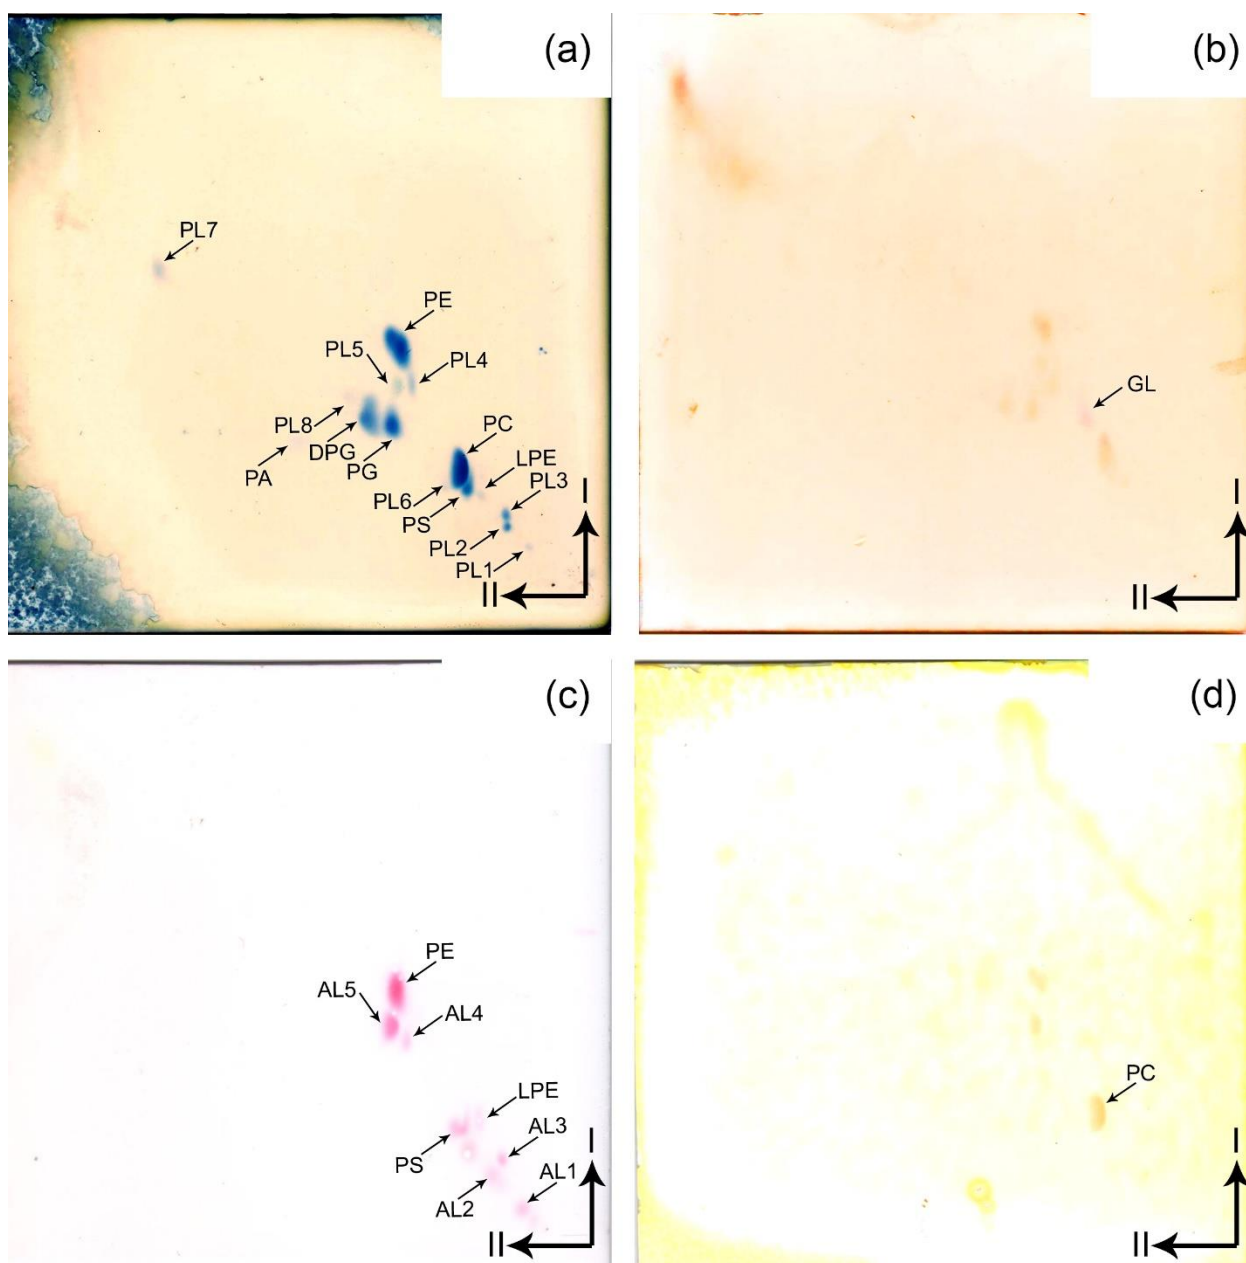

**Figure S9.** Identification of polar lipids from the strain *E. adhaerens* A<sup>T</sup>. The components were visualized by molybdenum blue (a);  $\alpha$ -naphthol (b); ninhydrin (c); and Dragendorff (d). Abbreviations: AL, aminolipids; DPG, diphosphatidylglycerols; GL, glycolipids; LPE, lysophosphatidylethanolamines; PA, phosphatidic acids; PC, phosphatidylcholines; PE, phosphatidylethanolamines; PG, phosphatidylglycerols; PL, phospholipids; PS, phosphatidylserines.

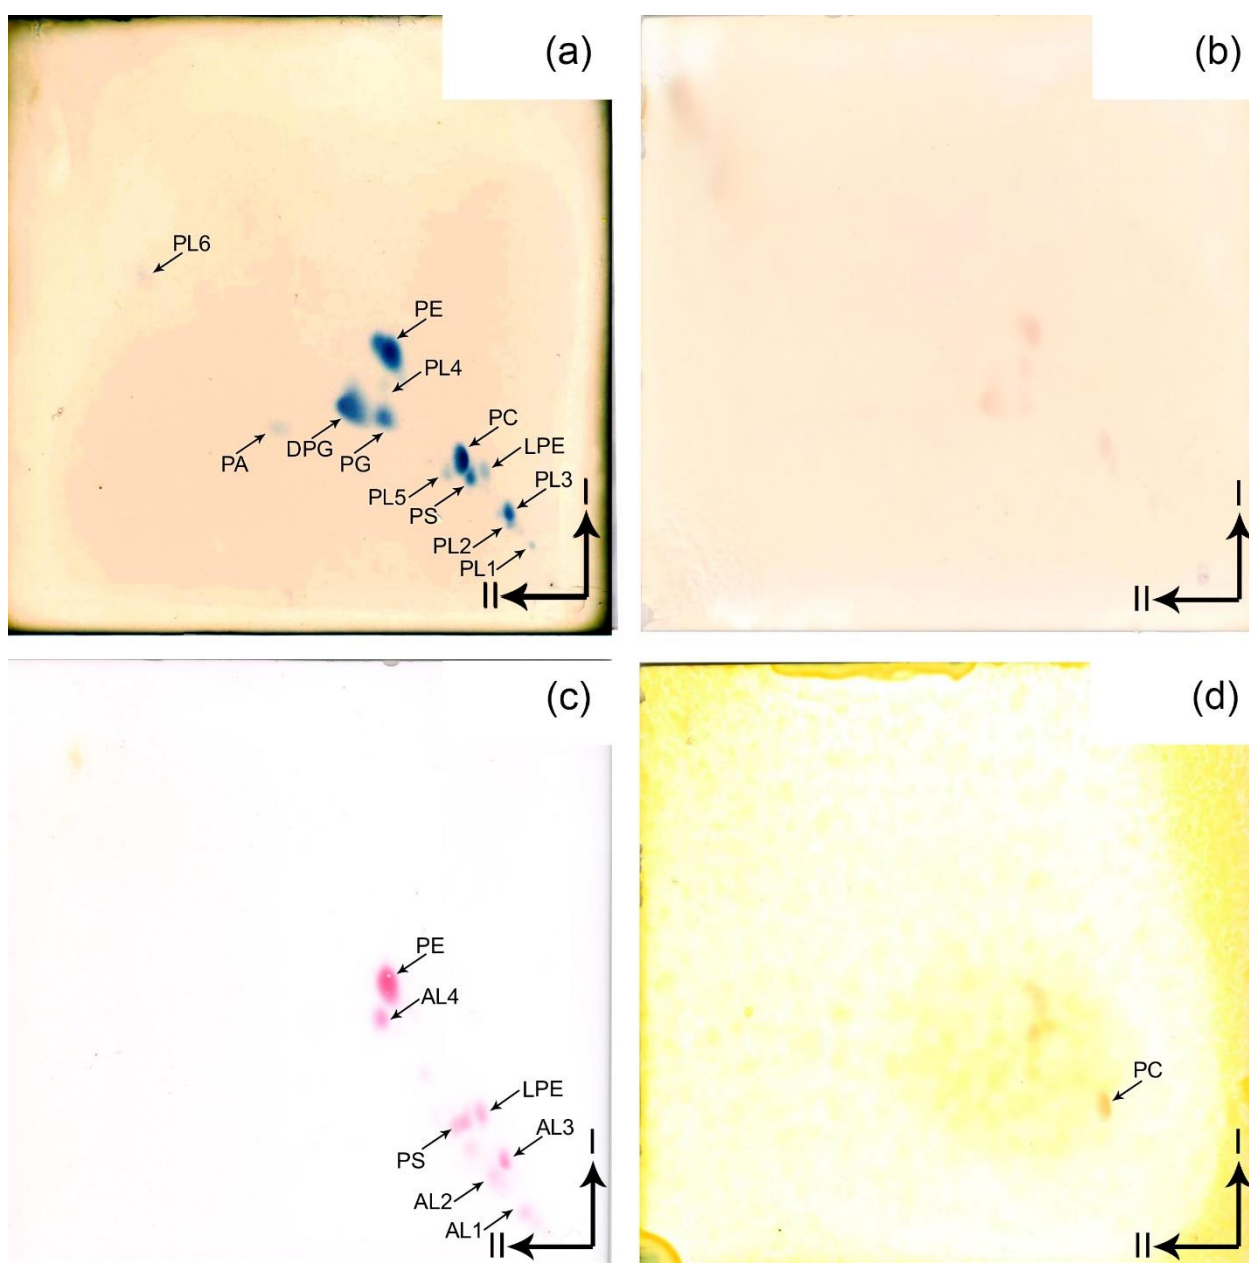

**Table S1.** Comparison of enzymatic activities of the strains HO-A22<sup>T</sup>, '*E. canadensis*' SHC 2-14, *E. adhaerens* A<sup>T</sup>, and *E. morelensis* Lc04<sup>T</sup>, determined by the API® ZYM test (bioMérieux, France). Designations: +, positive; –, negative; w, weakly positive.

| ENZYME                          | HO-A22 <sup>T</sup> | ' <i>E. canadensis</i> '<br>SHC 2-14 | <i>E. adhaerens</i><br>A <sup>T</sup> | <i>E. morelensis</i><br>Lc04 <sup>T</sup> |
|---------------------------------|---------------------|--------------------------------------|---------------------------------------|-------------------------------------------|
| Alkaline phosphatase            | +                   | w                                    | +                                     | w                                         |
| Esterase (C4)                   | w                   | w                                    | +                                     | w                                         |
| Esterase lipase (C8)            | w                   | w                                    | w                                     | w                                         |
| Lipase (C14)                    | –                   | –                                    | –                                     | –                                         |
| Leucine arylamidase             | +                   | –                                    | +                                     | +                                         |
| Valine arylamidase              | w                   | –                                    | +                                     | w                                         |
| Cystine arylamidase             | –                   | –                                    | +                                     | w                                         |
| Trypsin                         | –                   | –                                    | +                                     | +                                         |
| α-Chymotrypsin                  | w                   | w                                    | +                                     | +                                         |
| Acid phosphatase                | +                   | +                                    | +                                     | +                                         |
| Naphthol-AS-BI-phosphohydrolase | +                   | +                                    | +                                     | +                                         |
| α-Galactosidase                 | –                   | –                                    | –                                     | –                                         |
| β-Galactosidase                 | +                   | w                                    | w                                     | +                                         |
| β-Glucuronidase                 | –                   | –                                    | –                                     | –                                         |
| α-Glucosidase                   | +                   | +                                    | +                                     | +                                         |
| β-Glucosidase                   | +                   | +                                    | +                                     | +                                         |
| N-acetyl-β-glucosaminidase      | +                   | +                                    | +                                     | –                                         |
| α-Mannosidase                   | –                   | –                                    | –                                     | –                                         |
| α-Fucosidase                    | –                   | –                                    | –                                     | –                                         |

**Table S2.** Enzymatic activities of the strains HO-A22<sup>T</sup>, '*E. canadensis*' SHC 2-14, *E. adhaerens* A<sup>T</sup>, and *E. morelensis* Lc04<sup>T</sup> determined by the API® 20E test (bioMérieux, France). Designations: +, positive; –, negative; w, weakly positive.

| REACTIONS                                                   | HO-A22 <sup>T</sup> | ' <i>E.<br/>canadensis</i> '<br>SHC 2-14 | <i>E. adhaerens</i><br>A <sup>T</sup> | <i>E. morelensis</i><br>Lc04 <sup>T</sup> |
|-------------------------------------------------------------|---------------------|------------------------------------------|---------------------------------------|-------------------------------------------|
| β-Galactosidase                                             | w                   | w                                        | w                                     | w                                         |
| Arginine dihydrolase                                        | –                   | –                                        | –                                     | –                                         |
| Lysine decarboxylase                                        | –                   | –                                        | +                                     | –                                         |
| Ornithine decarboxylase                                     | –                   | –                                        | –                                     | –                                         |
| Citrate utilization                                         | –                   | –                                        | –                                     | –                                         |
| H <sub>2</sub> S production                                 | –                   | –                                        | –                                     | –                                         |
| Urease                                                      | –                   | –                                        | +                                     | –                                         |
| Tryptophane deaminase                                       | w                   | +                                        | w                                     | +                                         |
| Indole production                                           | –                   | –                                        | –                                     | –                                         |
| Acetoin production (Voges<br>Proskauer)                     | –                   | –                                        | –                                     | –                                         |
| Gelatinase fermentation/oxidation                           | –                   | –                                        | –                                     | –                                         |
| Glucose fermentation/oxidation                              | +                   | –                                        | –                                     | w                                         |
| Mannitol fermentation/oxidation                             | –                   | –                                        | –                                     | –                                         |
| Inositol fermentation/oxidation                             | –                   | –                                        | –                                     | –                                         |
| Sorbitol fermentation/oxidation                             | –                   | –                                        | –                                     | –                                         |
| Rhamnose fermentation/oxidation                             | +                   | w                                        | +                                     | w                                         |
| Sucrose fermentation/oxidation                              | –                   | –                                        | –                                     | –                                         |
| Melibiose fermentation/oxidation                            | w                   | –                                        | w                                     | –                                         |
| Amygdalin fermentation/oxidation                            | –                   | –                                        | –                                     | –                                         |
| Arabinose fermentation/oxidation                            | +                   | w                                        | +                                     | +                                         |
| NO <sub>3</sub> <sup>–</sup> → NO <sub>2</sub> <sup>–</sup> | +                   | +                                        | w                                     | +                                         |

**Table S3.** Carbohydrate fermentation by the strains HO-A22<sup>T</sup>, '*E. canadensis*' SHC 2-14, *E. adhaerens* A<sup>T</sup>, and *E. morelensis* Lc04<sup>T</sup>, determined by the API® 50CH test (bioMérieux, France). Designations: +, positive; –, negative; w, weakly positive.

| SUBSTRATE                 | HO-A22 <sup>T</sup> | ' <i>E. canadensis</i> '<br>SHC 2-14 | <i>E. adhaerens</i><br>A <sup>T</sup> | <i>E. morelensis</i><br>Lc04 <sup>T</sup> |
|---------------------------|---------------------|--------------------------------------|---------------------------------------|-------------------------------------------|
| 1                         | 2                   | 3                                    | 4                                     | 5                                         |
| Glycerol                  | +                   | w                                    | +                                     | +                                         |
| Erythritol                | +                   | w                                    | w                                     | +                                         |
| D-Arabinose               | +                   | w                                    | +                                     | +                                         |
| L-Arabinose               | +                   | +                                    | +                                     | +                                         |
| D-Ribose                  | +                   | +                                    | +                                     | +                                         |
| D-Xylose                  | +                   | +                                    | +                                     | +                                         |
| L-Xylose                  | +                   | w                                    | +                                     | +                                         |
| D-Adonitol                | +                   | w                                    | +                                     | +                                         |
| Methyl-βD-xylopyranoside  | –                   | –                                    | –                                     | –                                         |
| D-Galactose               | +                   | w                                    | +                                     | +                                         |
| D-Glucose                 | +                   | w                                    | +                                     | +                                         |
| D-Fructose                | +                   | w                                    | +                                     | +                                         |
| D-Mannose                 | +                   | w                                    | +                                     | +                                         |
| L-Sorbose                 | +                   | –                                    | –                                     | w                                         |
| L-Rhamnose                | +                   | w                                    | +                                     | +                                         |
| Dulcitol                  | +                   | –                                    | –                                     | w                                         |
| Inositol                  | +                   | w                                    | +                                     | +                                         |
| D-Mannitol                | +                   | w                                    | +                                     | +                                         |
| D-Sorbitol                | +                   | w                                    | +                                     | +                                         |
| Methyl-αD-mannopyranoside | –                   | –                                    | –                                     | w                                         |
| Methyl-αD-glucopyranoside | +                   | –                                    | w                                     | +                                         |
| N-acetylglucosamine       | +                   | –                                    | –                                     | +                                         |
| Amygdalin                 | +                   | –                                    | –                                     | w                                         |

**Supplementary Table S3 (continuation)**

| 1                     | 2 | 3 | 4 | 5 |
|-----------------------|---|---|---|---|
| Arbutin               | + | – | – | w |
| Aesculin (Fe citrate) | + | + | + | + |
| Salicin               | + | – | – | + |
| D-Cellobiose          | + | w | + | + |
| D-Maltose             | + | w | + | + |
| D-Lactose             | + | – | + | + |
| D-Melibiose           | w | – | + | + |
| D-Sucrose             | + | w | + | + |
| D-Trehalose           | + | w | + | + |
| Inulin                | – | – | – | – |
| D-Melicitose          | – | – | w | – |
| D-Raffinose           | w | – | w | w |
| Starch                | – | – | – | – |
| Glycogen              | – | – | – | – |
| Xylitol               | + | – | + | + |
| Gentiobiose           | + | – | w | + |
| D-Turanose            | + | w | + | + |
| D-Lyxose              | + | w | + | + |
| D-Tagatose            | + | + | + | + |
| D-Fucose              | + | + | + | + |
| L-Fucose              | + | + | + | + |
| D-Arabite             | + | w | + | + |
| L-Arabite             | + | w | w | + |
| Gluconate K           | – | – | – | – |
| 2-Ketogluconate K     | + | – | + | + |
| 5-Ketogluconate K     | – | – | – | – |



**Table S4.** Cellular fatty acid profiles of the strains HO-A22<sup>T</sup>, '*E. canadensis*' SHC 2-14, *E. adhaerens* A<sup>T</sup>, and *E. morelensis* Lc04<sup>T</sup>.

| FATTY ACIDS*           | HO-A22 <sup>T</sup> | ' <i>E. canadensis</i> '<br>SHC 2-14 | <i>E. adhaerens</i><br>A <sup>T</sup> | <i>E. morelensis</i><br>Lc04 <sup>T</sup> |
|------------------------|---------------------|--------------------------------------|---------------------------------------|-------------------------------------------|
| C <sub>14:0</sub> 3-OH | 7.5                 | 3.6                                  | –                                     | 4.8                                       |
| C <sub>16:0</sub> 3-OH | –                   | –                                    | 8.5                                   | –                                         |
| C <sub>16:1</sub>      | 4.8                 | 7.2                                  | 2.6                                   | 8.2                                       |
| C <sub>16:0</sub>      | 11.1                | 10.5                                 | 6.9                                   | 8.7                                       |
| C <sub>17:1</sub>      | 4.6                 | –                                    | 0.3                                   | 0.7                                       |
| C <sub>17:0</sub>      | 0.4                 | 0.2                                  | –                                     | 0.4                                       |
| C <sub>18:0</sub> 3-OH | 1.1                 | –                                    | 1.9                                   | 0.6                                       |
| C <sub>18:1</sub>      | 66.8                | 76.1                                 | 75.9                                  | 73.7                                      |
| C <sub>18:0</sub>      | 3.3                 | 2.4                                  | 3.5                                   | 2.7                                       |
| Others                 | 0.4                 | –                                    | 0.4                                   | 0.2                                       |

\*The values are percentages (w/w) of total fatty acids.
